# Supplementary material
Source: PubMed Central journal article supplement (PMC6014682)
Supplement: sb6b00219_si_001.pdf [file sb6b00219_si_001.pdf]

## **Supporting Information**

### **Reprogramming the transcriptional response to hypoxia with a chromosomally encoded cyclic peptide HIF-1 inhibitor.**

Ishna N. Mistry<sup>1</sup> and Ali Tavassoli<sup>1,2,\*</sup>

<sup>1</sup>Chemistry, University of Southampton, Southampton, SO17 1BJ, UK.

<sup>2</sup>Institute for Life Sciences, University of Southampton, Southampton, UK.

\* e-mail: a.tavassoli@soton.ac.uk

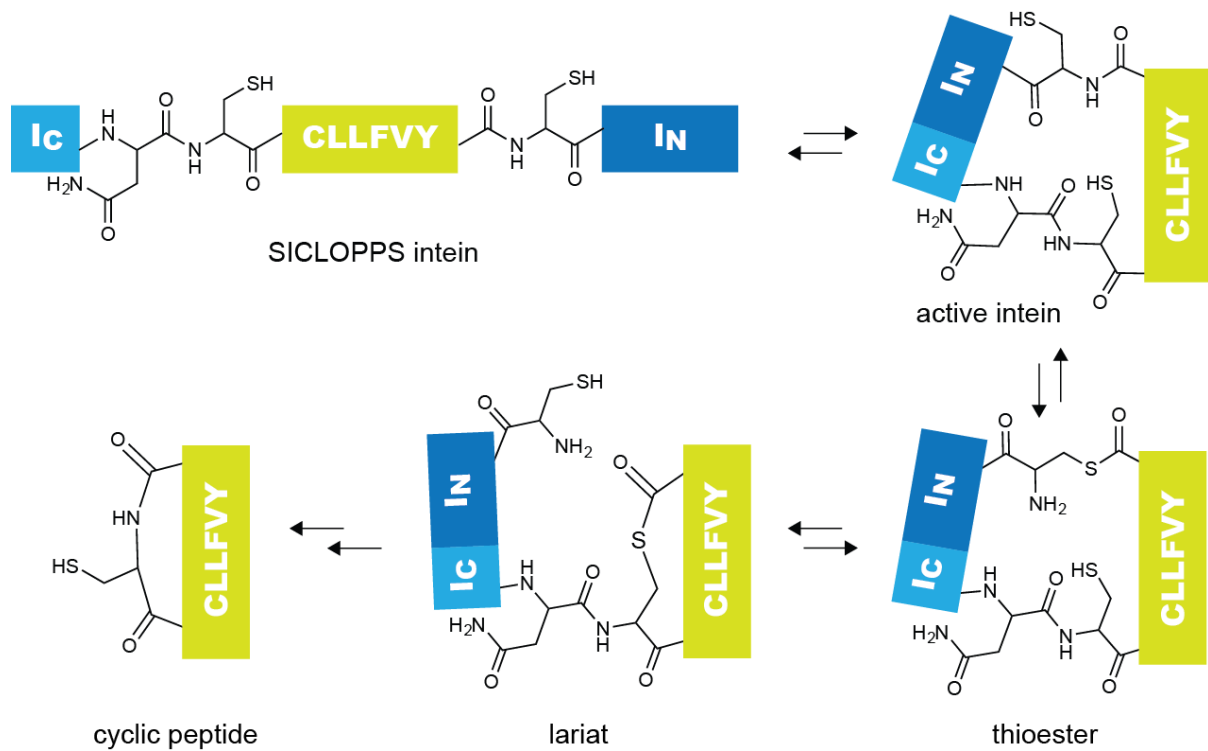

**Figure S1.** Mechanism of SICLOPPS intein splicing. Splicing is initiated by nucleophilic attack by the Cys residue at the N-intein/extein splice junction causing an N-S acyl shift of the peptide bond at the N-terminus and forming a thioester. Next, a nucleophilic attack by the Cys residue of the extein on the thioester bond results in cyclization of the extein, forming a lariat intermediate. Cyclization of the conserved C-terminal Asn cleaves the peptide bond, releasing the cyclized extein. The final step is a spontaneous N-S acyl shift resulting in the rearrangement of the thioester to an amide bond.

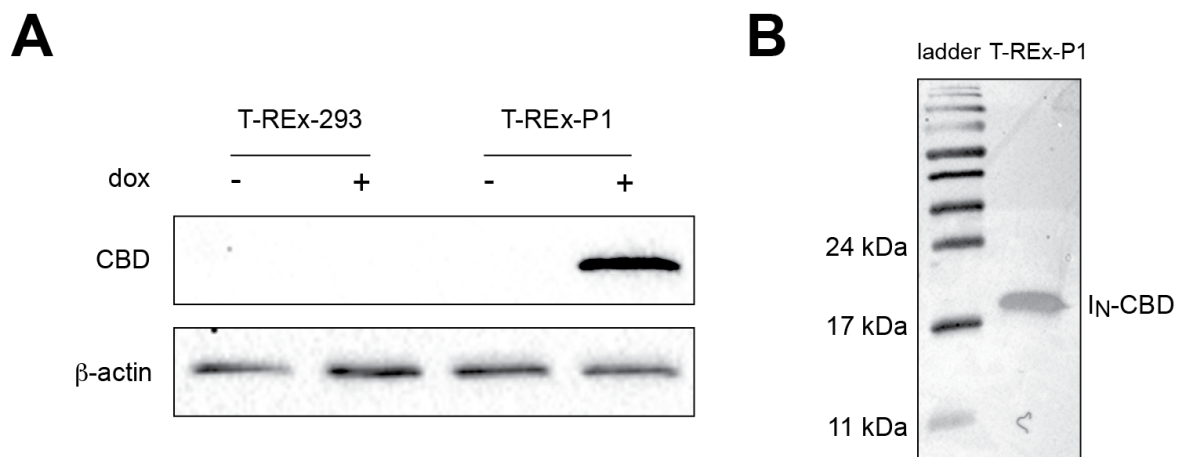

**Figure S2.** Western blot analysis of SICLOPPS protein expression in T-REx-P1 cells. **(A)** SICLOPPS protein was detected in T-REx-P1 cells treated with 1  $\mu$ g/mL dox but not in the unintegrated parent cell line T-REx-293, demonstrating successful integration and inducible expression of SICLOPPS inteins in T-REx-P1 cells. **(B)** Following treatment of T-REx-P1 cells with 1  $\mu$ g/mL dox for 24 h, a band corresponding to the N-intein (18 kDa) was detected, indicating full splicing of the SICLOPPS protein.

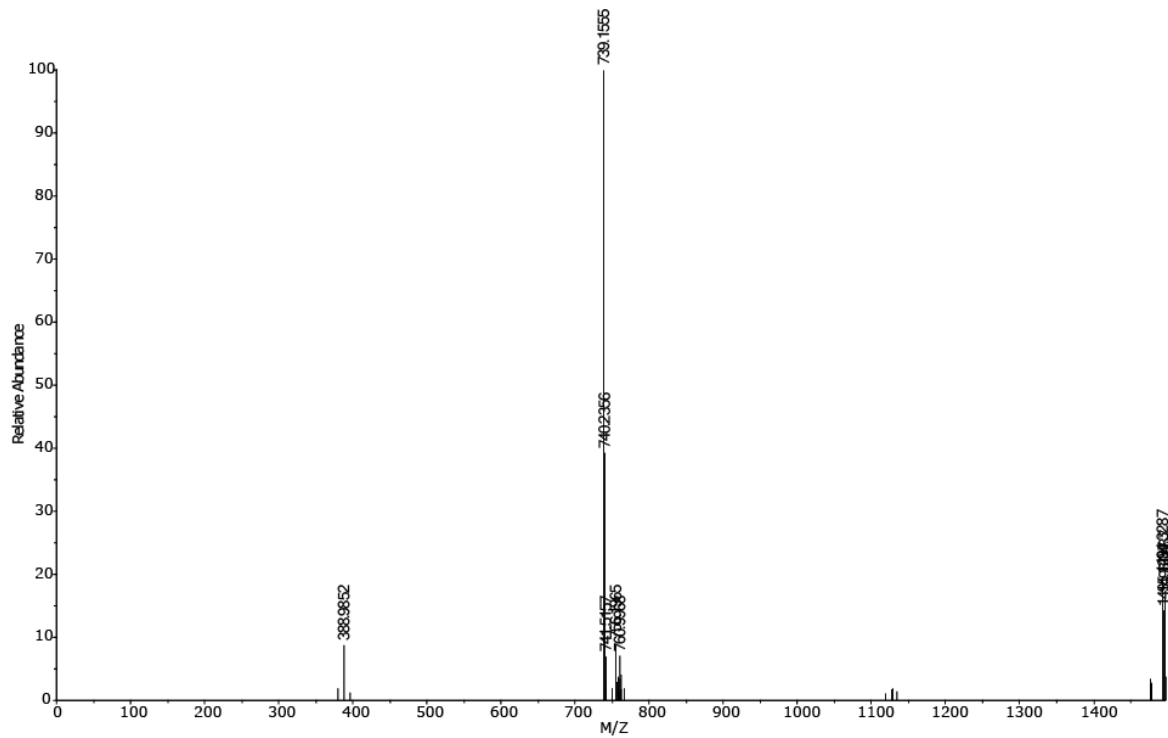

**Figure S3.** ESI+ MS trace of synthetic P1. LC-ESI-MS (ESI<sup>+</sup>, AcCN, 200 nm) RT 2.99 minutes shows: 739.2 ([M+H]<sup>+</sup>).

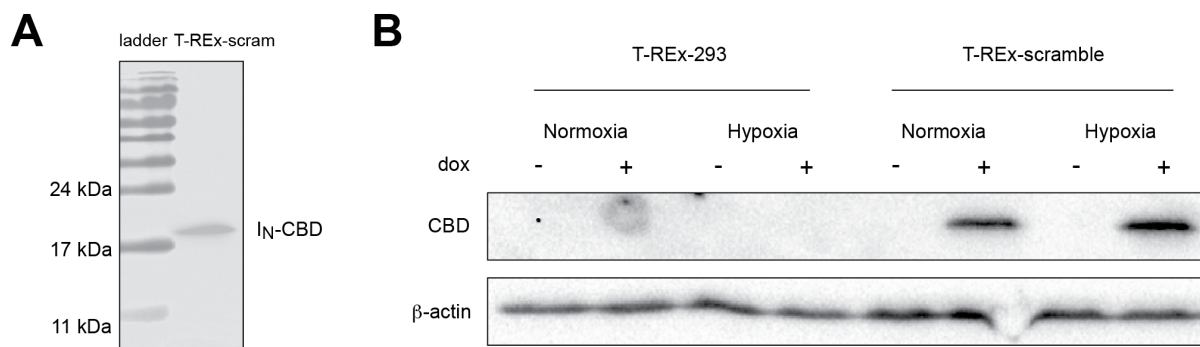

**Figure S4.** Western blot analysis of SICLOPPS protein in T-Rex-Scramble cells (A) Following treatment of T-Rex-scramble cells with 1  $\mu$ g/mL dox for 24 h, a band corresponding to the N-intein (18 kDa) was detected, indicating full splicing of the SICLOPPS inteins. (B) SICLOPPS protein was detected in T-Rex-Scramble cells treated with 1  $\mu$ g/mL dox but not in the unintegrated parent T-Rex-293 cells, demonstrating successful integration and inducible expression of the SICLOPPS construct in T-Rex-Scramble cells.

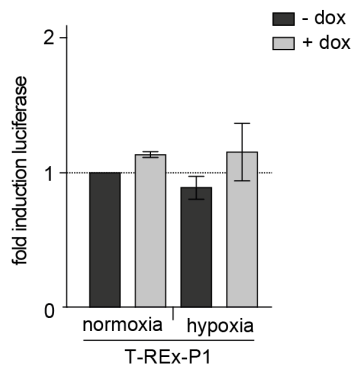

**Figure S5.** Production of P1 in T-REx-P1 cells does not significantly impact SV40-controlled luciferase expression. T-REx-P1 cells were transfected with pGL3-SV40-Luc. Cells were incubated with vehicle (-) or 1  $\mu$ g/mL dox (+) for 16 h in normoxia or hypoxia. Experiments were performed in triplicate (n=3). Error bars represent  $\pm$  SEM.

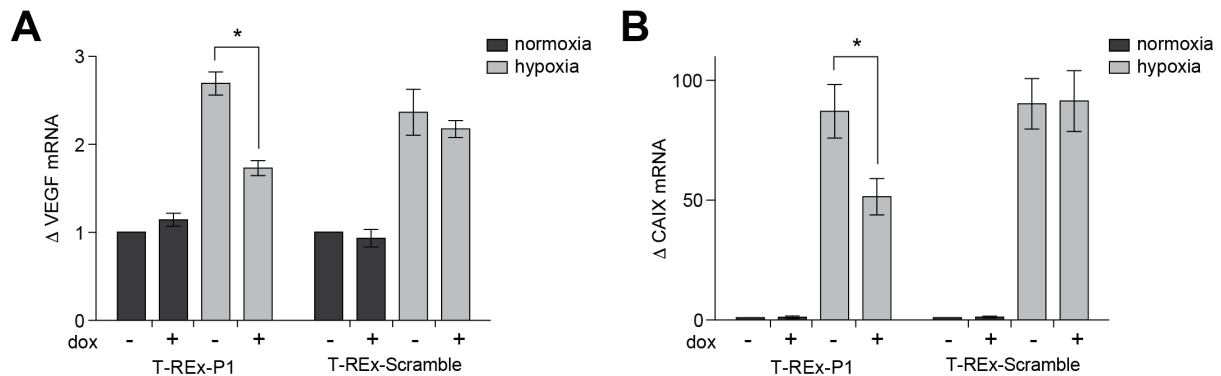

**Figure S6.** Hypoxic induction of VEGF and CAIX expression is reduced in cells producing P1 but not by those expressing a scrambled variant. T-REx-P1 and T-REx-Scramble cells were treated with vehicle (-) or dox (+) in normoxia or hypoxia for 24 h. **(A)** VEGF and **(B)** CAIX expression analysed by RT-qPCR normalized to expression of  $\beta$ -actin. Data are means (n=3)  $\pm$ SEM, \*p < 0.05.

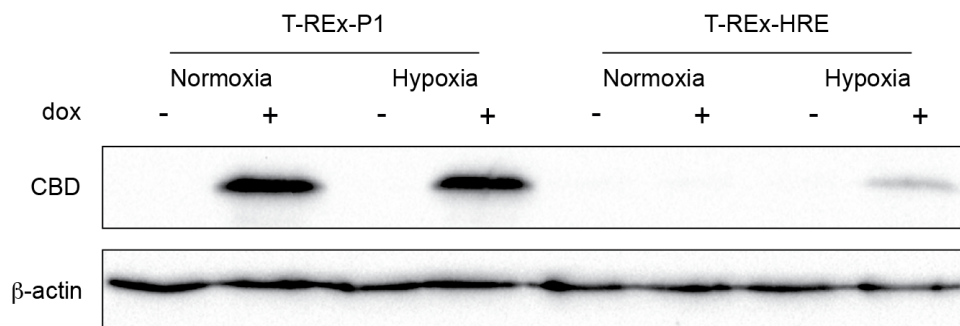

**Figure S7.** Western blot of SICLOPPS protein in T-REx-P1 and T-REx-HRE cells. Anti-CBD was used to detect integrated construct expression under the control of a CMV promoter (in T-REx-CLLFVY cells) or a HRE promoter (in T-REx-HRE cells). Cells were incubated with vehicle (-) or 1  $\mu$ g/mL dox (+) in normoxia or hypoxia for 16 h, with  $\beta$ -actin used as a loading control.

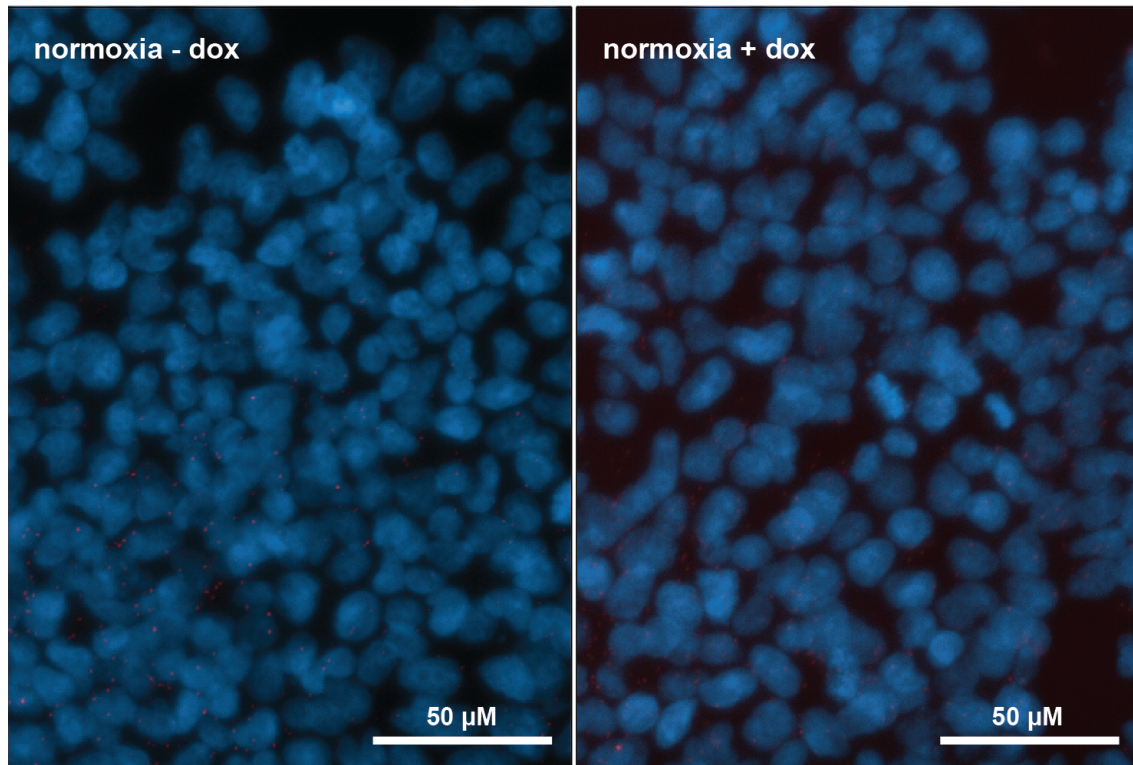

**Figure S8.** PLA signal is not observed in T-REx-HRE cells in normoxia. T-REx-HRE cells were treated with vehicle (-dox) or 1  $\mu\text{g}/\text{mL}$  dox (+dox) and incubated in normoxia for 24 h. Cells were fixed, permeabilized and incubated with primary antibodies. Cells were then incubated with Duolink reagents and visualised by fluorescence microscopy.

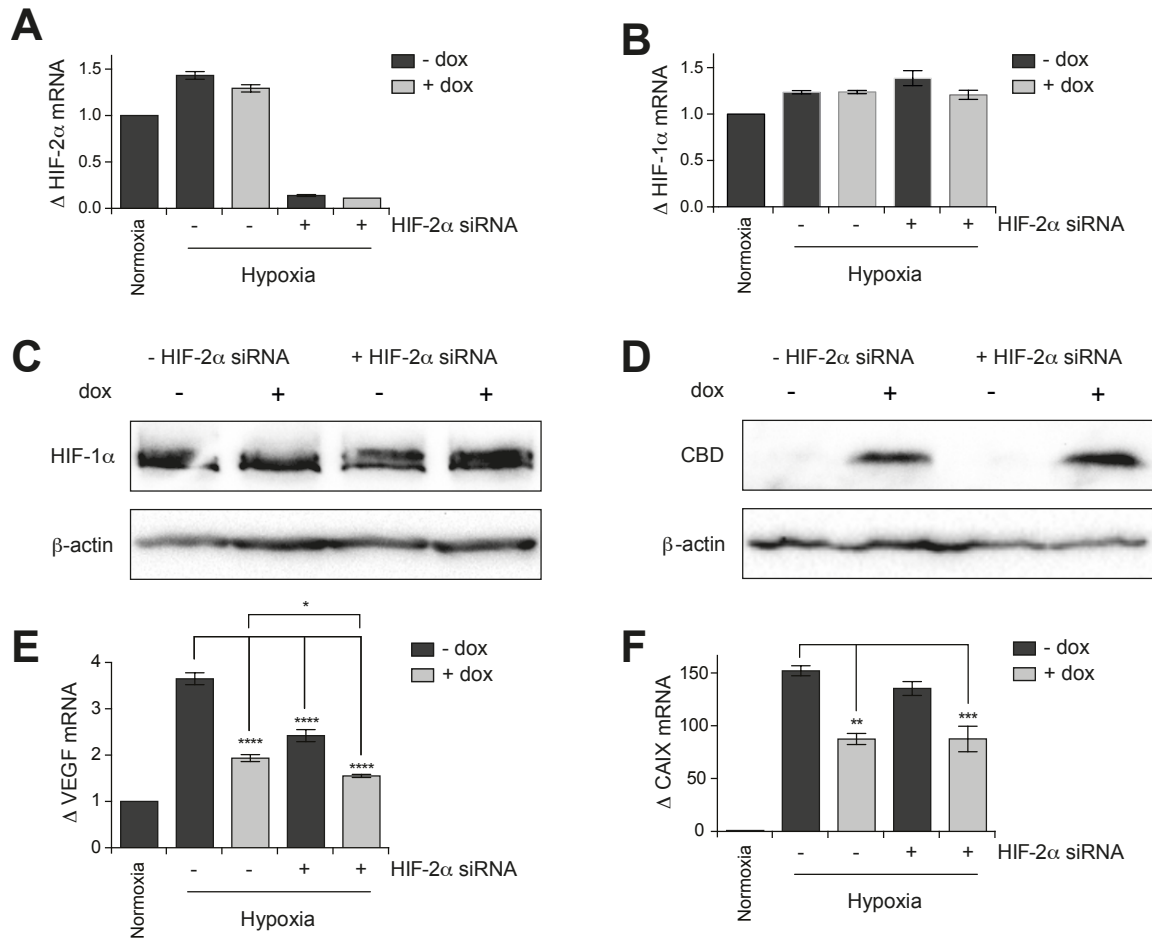

**Figure S9.** Effect of HIF-2 $\alpha$  knockdown on HIF-1 target gene expression. T-REx-HRE cells were transfected with negative control siRNA (-) or HIF-2 $\alpha$  siRNA (+) for 24 h then exposed to hypoxia for 24 h with vehicle (- dox) or 1  $\mu$ g/mL dox (+ dox). (A) RT-qPCR analysis of HIF-2 $\alpha$  mRNA shows HIF-2 $\alpha$  knockdown by siRNA. (B) RT-qPCR analysis of HIF-1 $\alpha$  expression shows it is not affected by dox treatment or HIF-2 knockdown. (C) Immunoblot analysis of HIF-1 $\alpha$  protein levels show they are not affected by dox treatment or HIF-2 $\alpha$  knockdown. (D) Immunoblot analysis of dox-induced SICLOPPS protein expression shows it is not affected by HIF-2 $\alpha$  knockdown. (E) RT-qPCR analysis of VEGF expression shows HIF-2 $\alpha$  knockdown inhibits it. (F) RT-qPCR analysis of CAIX expression shows it is not affected by HIF-2 $\alpha$  knockdown. Data are means (n=3)  $\pm$ SEM, \*p < 0.05, \*\*p < 0.01, \*\*\*p < 0.001, \*\*\*\*p < 0.0001.

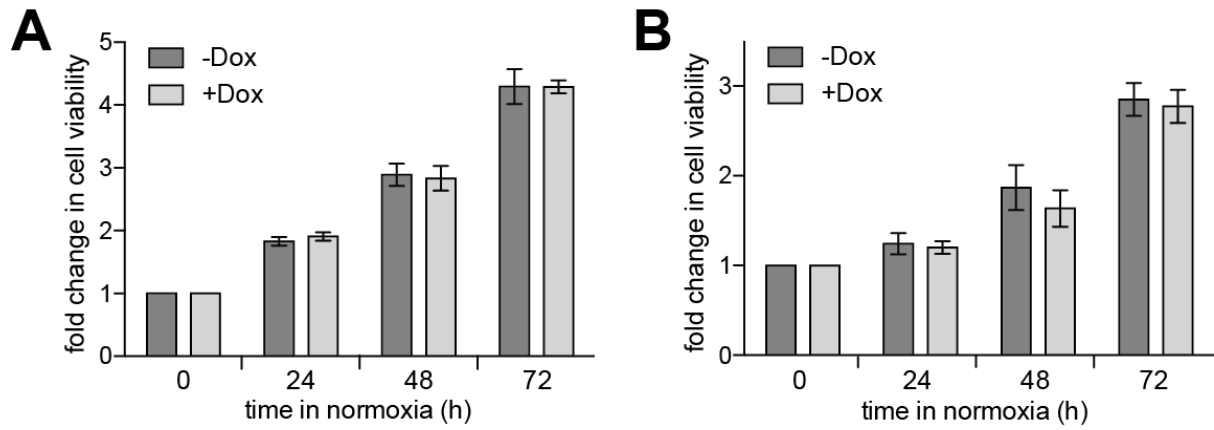

**Figure S10.** Viability of T-REx-HRE cells cultured for 72 hours in normoxia. **(A)** Cells were cultured in normoxia with or without 1 µg/mL dox and their viability assessed by an MTT assay at 0, 24, 48 and 72 h. **(B)** Cells were treated as (A) with the addition of 3 mg/mL 2DG. Data are means (n=3) ±SEM.

**Table S1.** Genes analysed in hypoxia array.

| <b>Gene Symbol</b> | <b>Gene Name</b>                                                                        | <b>Category</b>                 | <b>Group</b>                                | <b>NCBI Gene Reference</b> |
|--------------------|-----------------------------------------------------------------------------------------|---------------------------------|---------------------------------------------|----------------------------|
| ADM                | Adrenomedullin                                                                          | Signaling molecule              | Peptide hormone                             | NM_001124.1                |
| ANGPTL4            | Angiotensin-Like 4                                                                      | Signaling molecule              | Other signaling molecule                    | NM_139314.1                |
| ARNT               | Aryl Hydrocarbon Receptor Nuclear Translocator                                          | Transcription factor            | Basic helix-loop-helix transcription factor | NM_178426.1                |
| ARNT2              | Aryl-Hydrocarbon Receptor Nuclear Translocator 2                                        | Transcription factor            | Basic helix-loop-helix transcription factor | NM_014862.3                |
| ATP1B1             | ATPase, Na <sup>+</sup> /K <sup>+</sup> Transporting, Beta 1 Polypeptide                | Transporter                     | Cation transporter                          | NM_001001787.1             |
| BHLHB2             | Basic Helix-Loop-Helix Domain Containing, Class B, 2                                    | Nucleic acid binding            | Nuclease                                    | NM_003670.1                |
| CREBBP             | CREB Binding Protein (Rubinstein-Taybi Syndrome)                                        | Transcription factor            | Transcription cofactor                      | NM_001079846.1             |
| CUL2               | Cullin 2                                                                                | Miscellaneous function          | Other miscellaneous function protein        | NM_003591.2                |
| DDIT4              | DNA-Damage-Inducible Transcript 4                                                       | Molecular function unclassified | Molecular function unclassified             | NM_019058.2                |
| DDIT4L             | DNA-Damage-Inducible Transcript 4-Like                                                  | Molecular function unclassified | Molecular function unclassified             | NM_145244.2                |
| EGLN1              | Egl Nine Homolog 1 (C. Elegans)                                                         | Molecular function unclassified | Molecular function unclassified             | NM_022051.1                |
| EGLN2              | Egl Nine Homolog 2 (C. Elegans)                                                         | Molecular function unclassified | Molecular function unclassified             | NM_053046.2                |
| EGLN3              | Egl Nine Homolog 3 (C. Elegans)                                                         | Molecular function unclassified | Molecular function unclassified             | NM_022073.3                |
| EP300              | E1A Binding Protein P300                                                                | Transcription factor            | Transcription cofactor                      | NM_001429.2                |
| EPAS1              | Endothelial PAS Domain Protein 1                                                        | Transcription factor            | Basic helix-loop-helix transcription factor | NM_001430.3                |
| EPO                | Erythropoietin                                                                          | Signaling molecule              | Peptide hormone                             | NM_000799.2                |
| FRAP1              | FK506 Binding Protein 12-Rapamycin Associated Protein 1                                 | Kinase                          | Other kinase                                | NM_004958.2                |
| GAPDH              | Glyceraldehyde-3-Phosphate Dehydrogenase                                                | Oxidoreductase                  | Dehydrogenase                               | NM_002046.3                |
| GUSB               | Glucuronidase, Beta                                                                     | Hydrolase                       | Galactosidase                               | NM_000181.2                |
| HIF1A              | Hypoxia-Inducible Factor 1, Alpha Subunit (Basic Helix-Loop-Helix Transcription Factor) | Transcription factor            | Basic helix-loop-helix transcription factor | NM_181054.1                |
| HIF1AN             | Hypoxia-Inducible Factor 1, Alpha Subunit Inhibitor                                     | Molecular function unclassified | Molecular function unclassified             | NM_017902.2                |
| HIF3A              | Hypoxia Inducible Factor 3, Alpha Subunit                                               | Transcription factor            | Basic helix-loop-helix transcription factor | NM_152794.2                |
| HIG2               | Hypoxia-Inducible Protein 2                                                             | Molecular function unclassified | Molecular function                          | NM_013332.3                |



|        |                                                                         |                                 |                                      |                |
|--------|-------------------------------------------------------------------------|---------------------------------|--------------------------------------|----------------|
|        |                                                                         |                                 | unclassified                         |                |
| HMOX1  | Heme Oxygenase (Decycling) 1                                            | Oxidoreductase                  | Oxygenase                            | NM_002133.1    |
| HYOU1  | Hypoxia Up-Regulated 1                                                  | Chaperone                       | Hsp 70 family chaperone              | NM_006389.3    |
| IGFBP1 | Insulin-Like Growth Factor Binding Protein 1                            | Miscellaneous function          | Other miscellaneous function protein | NM_000596.2    |
| ING4   | Inhibitor Of Growth Family, Member 4                                    | Molecular function unclassified | Molecular function unclassified      | NM_016162.2    |
| MB     | Myoglobin                                                               | Transfer/carrier protein        | Other transfer/carrier protein       | NM_203377.1    |
| MT3    | Metallothionein 3                                                       | Miscellaneous function          | Other miscellaneous function protein | NM_005954.2    |
| NOS1   | Nitric Oxide Synthase 1 (Neuronal)                                      | Synthase and synthetase         | Synthase                             | NM_000620.1    |
| NOS2A  | Nitric Oxide Synthase 2A (Inducible, Hepatocytes)                       | Synthase and synthetase         | Synthase                             | NM_000625.3    |
| NOS3   | Nitric Oxide Synthase 3 (Endothelial Cell)                              | Synthase and synthetase         | Synthase                             | NM_000603.3    |
| NOTCH1 | Notch Homolog 1, Translocation-Associated (Drosophila)                  | Signaling molecule              | Membrane-bound signaling molecule    | NM_017617.3    |
| PIK3CA | Phosphoinositide-3-Kinase, Catalytic, Alpha Polypeptide                 | Kinase                          | Other kinase                         | NM_006218.2    |
| PRKAA1 | Protein Kinase, AMP-Activated, Alpha 1 Catalytic Subunit                | Kinase                          | Protein kinase                       | NM_206907.3    |
| PRKAA2 | Protein Kinase, AMP-Activated, Alpha 2 Catalytic Subunit                | Kinase                          | Protein kinase                       | NM_006252.3    |
| PTEN   | Phosphatase And Tensin Homolog (Mutated In Multiple Advanced Cancers 1) | Phosphatase                     | Protein phosphatase                  | NM_000314.4    |
| RBX1   | Ring-Box 1                                                              | Molecular function unclassified | Molecular function unclassified      | NM_014248.2    |
| SLC2A8 | Solute Carrier Family 2, (Facilitated Glucose Transporter) Member 8     | Transporter                     | Carbohydrate transporter             | NM_014580.3    |
| TGFBR2 | Transforming Growth Factor, Beta Receptor II (70/80kda)                 | Receptor                        | Cytokine receptor                    | NM_001024847.2 |
| TP53   | Tumor Protein P53                                                       | Transcription factor            | Other transcription factor           | NM_000546.3    |
| VEGFA  | Vascular Endothelial Growth Factor A                                    | Signaling molecule              | Growth factor                        | NM_001025366.1 |
| VHL    | Von Hippel-Lindau Tumor Suppressor                                      | Ligase                          | Other ligase                         | NM_198156.1    |
